# Supplementary material
Source: publisher figshare collection journal article supplement (https://acs.figshare.com/ndownloader/files/12035579)
Supplement: Supplementary file 1 [file 12035579]

# Supporting Information

## Mixing-to-Answer Iodide Sensing with Commercial Chemicals

Yuxiao Jia,<sup>†,‡</sup> Wenshu Zheng,<sup>†,‡</sup> Xiaohui Zhao,<sup>†</sup> Jiangjiang Zhang,<sup>†,‡</sup> Wenwen Chen,<sup>†</sup> and Xingyu Jiang<sup>\*,†,‡</sup>

<sup>†</sup> Beijing Engineering Research Center for BioNanotechnology & Key Lab for Biological Effects of Nanomaterials and Nanosafety, CAS Center for Excellence in Nanoscience, National Center for NanoScience and Technology, Beijing 100190, China.

<sup>‡</sup> University of Chinese Academy of Sciences, Beijing 100049, China.

\*Correspondence: xingyujiang@nanoctr.cn.

### Contents:

**Figure S1** Color changes of  $\text{HAuCl}_4$ , the mixture of  $\text{HAuCl}_4$  and PEI, and Au/PEI in the absence and presence of iodide.

**Figure S2** Color changes of Au/PEI, Au/PL, Au/PVP and Au/PEG in the absence and presence of iodide (20  $\mu\text{M}$ ).

**Figure S3** Color changes of Au/PEI with different ratio of PEI and  $\text{HAuCl}_4$  in response to iodide.

**Figure S4** Color changes of Au/PEI prepared at different temperature for different length of time in response to iodide.

**Figure S5** Selectivity of Au/PEI and Au/PEI/GH.

**Figure S6** Au/PEI/GH micro-pipette tips and Au/PEI/GH tube for iodide sensing.

|                    |                                                                                   |                                                                                   |                                                                                   |                                                                                   |                                                                                     |                                                                                     |
|--------------------|-----------------------------------------------------------------------------------|-----------------------------------------------------------------------------------|-----------------------------------------------------------------------------------|-----------------------------------------------------------------------------------|-------------------------------------------------------------------------------------|-------------------------------------------------------------------------------------|
|                    |  |  |  |  |  |  |
| HAuCl <sub>4</sub> | +                                                                                 | +                                                                                 | +                                                                                 | +                                                                                 | +                                                                                   | +                                                                                   |
| PEI                |                                                                                   |                                                                                   | +                                                                                 | +                                                                                 | +                                                                                   | +                                                                                   |
| Incubation         |                                                                                   |                                                                                   |                                                                                   |                                                                                   | +                                                                                   | +                                                                                   |
| I <sup>-</sup>     |                                                                                   | +                                                                                 |                                                                                   | +                                                                                 |                                                                                     | +                                                                                   |

**Figure S1** Color changes of HAuCl<sub>4</sub>, the mixture of HAuCl<sub>4</sub> and PEI, and Au/PEI in the absence and presence of iodide.

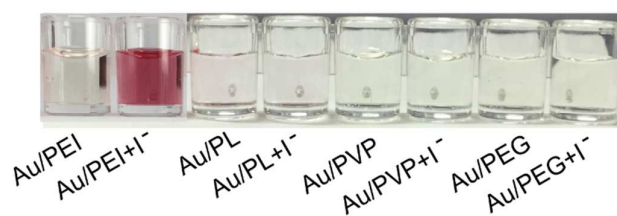

**Figure S2** Color changes of Au/PEI, Au/PL, Au/PVP and Au/PEG in the absence and presence of iodide (20  $\mu$ M). Au/PL, Au/PVP and Au/PEG are fabricated following the same protocol as Au/PEI's by incubating HAuCl<sub>4</sub> with poly-lysine (PL), polyvinyl pyrrolidone (PVP) and polyethylene glycol (PEG) at 60  $^{\circ}$ C for 5 min.

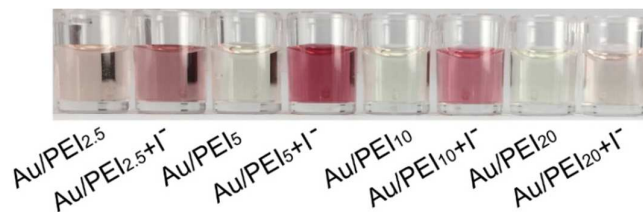

**Figure S3** Color changes of Au/PEI with different ratio of PEI and HAuCl<sub>4</sub> including 2.5 (Au/PEI<sub>2.5</sub>), 5 (Au/PEI<sub>5</sub>), 10 (Au/PEI<sub>10</sub>) and 20 (Au/PEI<sub>20</sub>) in the absence and presence of iodide (20  $\mu$ M).

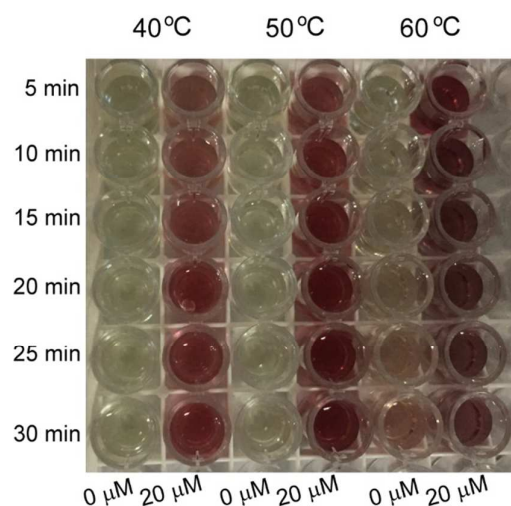

**Figure S4** Color changes of Au/PEI prepared at different temperature for different length of time in response to iodide.

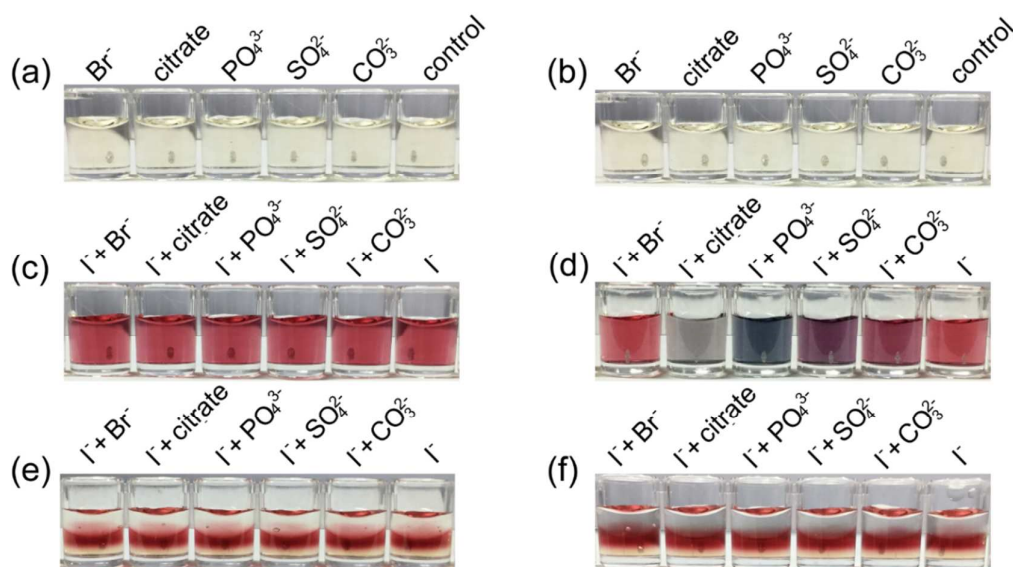

**Figure S5** Selectivity of Au/PEI and Au/PEI/GH. Au/PEI in the presence of (a) 100  $\mu\text{M}$  and (b) 500  $\mu\text{M}$  anions including  $\text{Br}^-$ , citrate,  $\text{PO}_4^{3-}$ ,  $\text{SO}_4^{2-}$  and  $\text{CO}_3^{2-}$ . Au/PEI in the presence of the mixture of  $\text{I}^-$  (20  $\mu\text{M}$ ) and (c) 100  $\mu\text{M}$  and (d) 500  $\mu\text{M}$  anions including  $\text{Br}^-$ , citrate,  $\text{PO}_4^{3-}$ ,  $\text{SO}_4^{2-}$  and  $\text{CO}_3^{2-}$ . Au/PEI/GH in the presence of the mixture of  $\text{I}^-$  (20  $\mu\text{M}$ ) and (e) 100  $\mu\text{M}$  and (f) 500  $\mu\text{M}$  anions including  $\text{Br}^-$ , citrate,  $\text{PO}_4^{3-}$ ,  $\text{SO}_4^{2-}$  and  $\text{CO}_3^{2-}$ .

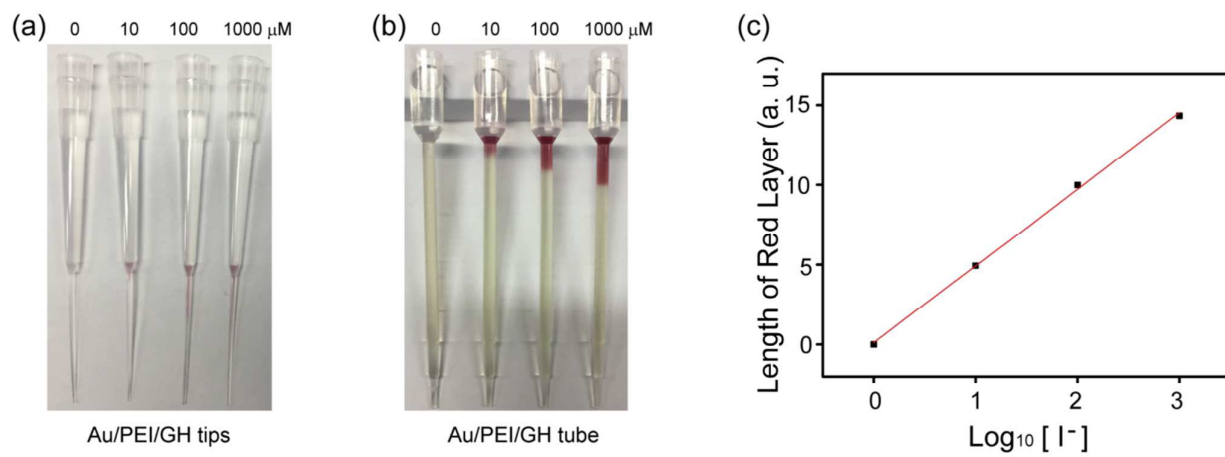

**Figure S6** Length-based devices based on Au/PEI/GH. (a) Au/PEI/GH micro-pipette tips and (b) Au/PEI/GH tube for iodide sensing. (c) Linear relationship of the length of red layers of Au/PEI/GH tube to  $\text{Log}_{10}[\text{I}^-]$ .
